# Supplementary material for: A Modular In Vitro Platform for the Production of Terpenes and Polyketides from CO2
Source: PubMed Central journal article supplement (PMC8362062; doi:10.1002/anie.202102333), 2021-06-03
Supplement: ANIE-60-16420-s001.pdf [file ANIE-60-16420-s001.pdf]

## Supporting Information

### **A Modular In Vitro Platform for the Production of Terpenes and Polyketides from CO<sub>2</sub>**

*Srividhya Sundaram, Christoph Diehl, Niña Socorro Cortina, Jan Bamberger, Nicole Paczia, and Tobias J. Erb\**

anie\_202102333\_sm\_miscellaneous\_information.pdf

## SUPPORTING INFORMATION

## Table of Contents

|                                                                                                     |    |
|-----------------------------------------------------------------------------------------------------|----|
| General materials and equipment .....                                                               | 3  |
| Experimental Procedures .....                                                                       | 3  |
| Chemical synthesis of CoA esters .....                                                              | 3  |
| Analysis of CoA esters .....                                                                        | 3  |
| Table S1 .....                                                                                      | 3  |
| Table S2 .....                                                                                      | 3  |
| Plasmids, cloning and mutagenesis .....                                                             | 3  |
| Protein production and purification .....                                                           | 4  |
| <i>In vitro</i> reconstitution of BHAC .....                                                        | 4  |
| <i>In vitro</i> reconstitution of terpenoid pathway .....                                           | 4  |
| <i>In vitro</i> reconstitution of PDH production .....                                              | 5  |
| Coupling of CETCH and BHAC .....                                                                    | 5  |
| Coupling of CETCH, BHAC and terpenoid pathway .....                                                 | 5  |
| Analysis of CO <sub>2</sub> incorporation using labeled sodium bicarbonate and sodium formate ..... | 5  |
| UPLC-MS analysis of malate .....                                                                    | 6  |
| Table S3 .....                                                                                      | 6  |
| Table S4 .....                                                                                      | 6  |
| Coupling of CETCH, BHAC and PDH production .....                                                    | 6  |
| UPLC-MS analysis of terpene and polyketide intermediates .....                                      | 6  |
| Supplementary text .....                                                                            | 7  |
| Optimization of CETCH, summarized from earlier publications .....                                   | 7  |
| Optimization of BHAC, this work .....                                                               | 7  |
| Supporting figures and tables .....                                                                 | 8  |
| Figure S1 .....                                                                                     | 8  |
| Figure S2 .....                                                                                     | 8  |
| Figure S3 .....                                                                                     | 9  |
| Figure S4 .....                                                                                     | 9  |
| Figure S5 .....                                                                                     | 10 |
| Figure S6 .....                                                                                     | 10 |
| Figure S7 .....                                                                                     | 11 |
| Figure S8 .....                                                                                     | 11 |
| Figure S9 .....                                                                                     | 12 |
| Figure S10 .....                                                                                    | 12 |
| Table S5 .....                                                                                      | 13 |
| Table S6 .....                                                                                      | 14 |
| Table S7 .....                                                                                      | 15 |
| References .....                                                                                    | 17 |

## SUPPORTING INFORMATION

**General materials and equipment**

Limonene,  $\alpha$ -pinene and  $\beta$ -farnesene were obtained from Sigma Aldrich (Munich, Germany). Sabinene was obtained from Santa Cruz Biotechnology Inc. (Dallas, USA) and  $\alpha$ -bisabolene was obtained from Alfa Aesar (Haverhill, USA). Chemicals and materials for cloning and protein expression were purchased from New England Biolabs GmbH (Frankfurt am Main, Germany) and Macharey-Nagel GmbH (Düren, Germany). Synthesis of optimized genes was done by Baseclear AG (Leiden, Netherlands). High resolution MS measurements were performed using an IDX Orbitrap High Performance Benchtop HRMS with an electrospray ion source and an Integriion HPLC system (Thermo Scientific). Mass spectroscopic data are reported as mass per charge ratio ( $m/z$ ). Site-directed mutagenesis was performed using Quikchange II XL kit (Agilent). Identity of all recombinant proteins was confirmed using SDS-PAGE.

**Experimental Procedures****Chemical synthesis of CoA esters**

The synthesis of CoA esters and their analysis by LCMS was performed based on a previously published study by Peter *et al.*,<sup>[1]</sup>

**Analysis of CoA esters**

Malyl-CoA and acetyl-CoA were measured on a triple quadrupole mass spectrometer (Agilent Technologies 6495 Triple Quad LS/MS) equipped with an UHPLC (Agilent Technologies 1290 Infinity II) using a 50 x 2.1 mm C18 column (Kinetex 1.7  $\mu$ m EVO C18 100 Å) at 25 °C. The injection volume was 2  $\mu$ l of the diluted samples (1:10 in water). The flow was set to 0.250 ml/min and the separation was performed using 50 mM ammonium formate pH 8.1 (buffer A) and acetonitrile (B). We quantified the CoAs using external standard curves prepared in 1:10 diluted (water) sample matrix. The parameters for the multiple reaction monitoring (MRMs) are displayed in table S1 and the gradient in table S2. Data analysis was done using the Agilent Mass Hunter Workstation Software.

**Table S1** MRM transitions for malyl- and acetyl-CoA

| Compound                | Precursor Ion | Product Ion | Dwell | Fragmentor | Collision Energy | Cell Accelerator Volt. | Polarity |
|-------------------------|---------------|-------------|-------|------------|------------------|------------------------|----------|
| Malyl-CoA (Quantifier)  | 884.1         | 377.1       | 30    | 380        | 37               | 5                      | Positive |
| Malyl-CoA (Qualifier)   | 884.1         | 428         | 30    | 380        | 29               | 5                      | Positive |
| Acetyl-CoA (Quantifier) | 810.1         | 302.2       | 30    | 380        | 35               | 5                      | Positive |
| Acetyl-CoA (Qualifier)  | 810.1         | 428         | 30    | 380        | 35               | 5                      | Positive |

**Table S2** Gradient used for the separation of CoAs

| Time [min] | A [%] | B [%] |
|------------|-------|-------|
| 0          | 100   | 0     |
| 2          | 100   | 0     |
| 5          | 94    | 6     |
| 8          | 77    | 23    |
| 10         | 20    | 80    |
| 11         | 20    | 80    |
| 12         | 100   | 0     |
| 12.5       | 100   | 0     |

**Plasmids, cloning and mutagenesis**

The plasmids generated by Schwander *et al.*,<sup>[2]</sup> and Borzyskowski *et al.*,<sup>[3]</sup> were used to produce the enzymes to reconstitute CETCH and BHAC. The plasmid for the malate dehydrogenase is derived from Kitagawa *et al.*,<sup>[4]</sup> The plasmid for the production of MtkAB is a gift from Thomas Schwander. The optimized genes corresponding to the terpene and PKS pathways were either obtained from a previous study<sup>[3]</sup> or synthesized as from Baseclear (Leiden, Netherlands). The list of all the plasmids with the details of vector and purification tags is listed in table S5. Primers and protocol for the point mutation of the PKS<sub>SgcE</sub> KS domain were designed based on the Quikchange II XL mutagenesis kit manual (Agilent). The plasmid that expresses PKS<sub>SgcE</sub> under the control of T7 promoter was used as template to make the mutation. The primers used for generating the point mutation are PKS<sub>SgcE</sub>\_KS<sub>Cys</sub>\_fw: CTACACGGTTGATGGCGCGGCTTCCTCTAGCTTGCTGAG and PKS<sub>SgcE</sub>\_KS<sub>Cys</sub>\_rv: CTCAGCAAGCTAGAGGAAGCCGCGCCATCAACCGTGTAG. After PCR amplification and inactivation of any template DNA by DpnI, 1/10<sup>th</sup> the sample volume of 3 M sodium acetate (pH 5.2) was added to precipitate the amplified product. The precipitate was washed with 2.5 volumes of 100% ice-cold ethanol. After a brief centrifugation, the DNA pellet was further washed with 70% ethanol. The

## SUPPORTING INFORMATION

enriched plasmid was then directly used for transformation of *E. coli* XL-10 gold ultra-competent cells by electroporation. After confirming the mutant by DNA sequencing (Microsynth), the plasmid was introduced into *E. coli* BL21 (DE3) (New England Biolabs).

**Protein production and purification**

The plasmids to reconstitute the terpene and PKS pathway were expressed in *E. coli* BL21 (DE3). *E. coli* transformants were cultivated in LB medium at 37 °C. After  $A_{600nm}$  reached ~ 0.4 - 0.5, the cells were induced with 0.1 mM IPTG at 18 °C for 16 - 20 h. The cell pellet was dissolved (10 ml buffer/g pellet) in 150 mM Tris buffer pH 7.5 containing 0.2 M NaCl. After disrupting the cells by sonication, the cells were centrifuged at 20,000 g at 4 °C for 30 min. The lysed supernatant was then loaded onto a Ni-NTA column (Macherey Nagel) connected to a FPLC machine. Proteins were eluted using the same buffer with 0.25 or 0.5 M imidazole. For Idi, PKS<sub>SgcE</sub> and TE<sub>SgcE</sub>, the buffers also contained 1 mM DTT to avoid protein precipitation. The fraction containing the target protein from Ni-NTA column was diluted twice with 100 mM Tris (pH 7.5) and purified further by an ion-exchange column (5 mL HiTrap Q HP, GE Healthcare). Proteins were eluted over 20 column volumes of 100 mM Tris (pH 7.5) and 1 M NaCl, and the target proteins were concentrated using Amicon columns (MWCO 10, 30 and 100 kDa – Millipore). All the purified proteins were stored in 50 mM Tris buffer pH 7.5 containing 20 mM NaCl and 10% glycerol at -80 °C until further analysis. Except Hmgr, Idi and PKS<sub>SgcE</sub>, the proteins were stable and active up to a period of 6 months under this storage condition.

Proteins to reconstitute the CO<sub>2</sub> to acetyl-CoA conversion (CETCH, BHAC and additional enzymes) were produced in *E. coli* BL21 (DE3) or Rosetta (DE3) pLysS (methylsuccinyl-CoA and propionyl-CoA oxidases (Mco, Pco)). For expression of 4-hydroxybutyryl-CoA synthase (Hbs) we co-expressed the 60 kDa chaperoin (groESL) for the correct folding of the protein. After transformation in the expression strains, the cultures were grown overnight on LB-agar plates containing the selection antibiotics. 2 l of salt buffered TB medium was directly inoculated with colonies from the selection plates and grown on 37 °C and 90 rpm till  $A_{600nm}$  0.5-1.0. In general, the cultures were cooled down to 21 °C and induced with 0.25 mM IPTG. For 4-hydroxybutyryl-CoA hydratase (Hbd) 100 μM of Fe(II)SO<sub>4</sub>, 100 μM Fe(III)citrate and 20 mM fumarate were added along with IPTG. The Hbd-expressing culture was grown until  $A_{600nm}$  4.0 and cooled down in a closed sterile Schott bottle to express the protein under microaerobic conditions. Except Pco, the expression of the proteins was done overnight. Pco was expressed at 25 °C for 4 h. The cells were harvested by centrifugation (15 min, 4 °C, 6000 g). Afterwards the cells were resuspended (2 ml buffer/g pellet) lysis buffer (500 mM NaCl, 50 mM HEPES, 10% glycerol, pH 7.8 at RT). 5 mM MgCl<sub>2</sub>, 10 μg/ml DNase and one tablet of SigmaFAST Protease Inhibitor Cocktail (Sigma-Aldrich) were added. The cells were lysed by micro fluidizer (twice at 16.000 psi). Afterwards the cell debris was spun down at 50,000 g for 1 h at 4 °C. The supernatant was filtered through a 0.45 μm membrane. Except for the glyoxylate reductase, the lysate was mixed with 3 ml Protino Ni-NTA agarose beads (Macherey-Nagel) and incubated on ice for 30-45 min (70 rpm). Afterwards the beads were collected in a gravity column and washed with three column volumes (cv) of lysis buffer. For the removal of unspecific bound proteins, the beads were washed with three cv of lysis buffer containing an additional 50 mM of imidazole and three cv with 75 mM imidazole. The elution was done with two cv of lysis buffer containing 500 mM imidazole. Since the glyoxylate reductase has a streptavidin (Strep) tag, the lysate was loaded on a Cytiva StrepTrap™ HP prepacked column attached to an Äkta start FPLC adjusted to a flow rate of 1 ml/min. The desalting/storage buffer was used for lysis and purification. The elution was done using the desalting/storage buffer with 5 mM d-Desthiobiotin. The collected recombinant proteins were concentrated using Amicon Ultra 15 mL Centrifugal Filters (Merck) accordingly to the protocol provided by the supplier. For desalting the protein solution was loaded on a HiLoad 16/600 Superdex 200 pg column (GE Healthcare). The desalting/storage buffer contained 200 mM NaCl, 50 mM HEPES and 10% glycerol and was adjusted to pH 7.8 at room temperature (22 °C). For Hbs and Hbd a concentration of 500 mM NaCl was used. The collected fractions were pooled and concentrated again. FAD was added to Pco and Mco depending on the concentration of protein. Enzymes requiring metal ions and cofactors were stored in 5 mM MgCl<sub>2</sub> and 2 mM Coenzyme B12 respectively. For the final storage, glycerol was added to a final concentration of 20 %. The proteins were flash frozen in liquid nitrogen and stored at -80 °C until further analysis.

**In vitro reconstitution of BHAC**

We tested four different setups for the reconstruction of the whole BHAC (Figure S1A). The general assay mix contained 100 mM HEPES-KOH pH 7.5, 5 mM MgCl<sub>2</sub>, 20 mM sodium formate, 5 mM NADH, 5 mM NADPH, 0.1 mM pyridoxalphosphate, 14.4 μM (0.67 mg/ml) formate dehydrogenase, 0.33 μM (0.0115 mg/ml) malate dehydrogenase, 2.26 μM (0.099 mg/ml) BhcB, 1.37 μM (0.049 mg/ml) BhcC, 14.84 μM (0.508 mg/ml) BhcD and 0.5 mM glyoxylate as substrate. The four setups contained additionally: 1) 0.5 mM glycine and 0.79 μM (0.043 mg/ml) BhcA, 2) 5.0 mM glycine and 0.79 μM (0.043 mg/ml) BhcA, 3) 0.5 mM glycine and 19.83 μM (0.890 mg/ml) BhcA and 4) 5.0 mM glycine and 19.83 μM (0.890 mg/ml) BhcA. The reactions were carried out at 30 °C in duplicates and in 50 μl reaction volume. 12 μl samples were withdrawn at 30, 60 and 90 min and quenched with 1.5 μl of 50 % formic acid and 1.5 μl of 500 mM polyphosphate for protein precipitation. The quenched samples were kept on ice until the end of the experiment and spun down at 20,000 g for 20 min at 4 °C. The supernatant was transferred into fresh tubes and stored at -20 °C until measurement.

**In vitro reconstitution of the terpene biosynthesis modules**

The reactions for the *in vitro* production of **1-5** were performed in a sealed glass vial. Briefly, in a 100 μL reaction, 1 mM NADPH, 20 mM formate, 3 mM ATP, 3 mM PEP, 2 mM NADH, 1 mM DTT, 5 mM MgCl<sub>2</sub>, 10 mM KCl were added in 50 mM Tris buffer pH 8.0. The list of enzymes and their amounts are listed in table S5. The reaction was initiated by adding 0.5 mM or 1 mM acetyl-CoA. To trap

## SUPPORTING INFORMATION

the volatile monoterpenes (**1-3**), the assay mix was overlaid with 30  $\mu$ l of isopropylmyristate. The samples were incubated at 30 °C with shaking at 400 rpm up to 24 h. At specified intervals, the organic layer is withdrawn and diluted with hexane. The volume of isopropylmyristate withdrawn was simultaneously added to the reaction mix during the course of the assay. For the samples assaying the production of **4** and **5**, at these intervals, the workup of the samples was done by extracting twice the volume with ethyl acetate. The mix was then spun at 20,000 g for 15 min at 4 °C. The aqueous phase was mixed with equal volume of methanol and centrifuged to precipitate the proteins. Both the organic and aqueous phase were saved at -80 °C until further analysis. All the reactions were set up in triplicates.

### ***In vitro* reconstitution of the PDH production**

The *in vitro* assay for the reconstitution of PKS pathway to produce pentadecaheptaene (PDH) was performed as described previously<sup>[5]</sup> with minor modifications. In 100 mM phosphate buffer pH 8.0, 0.2 mM or 1.2 mM acetyl-CoA, 1.2 mM malonyl CoA, 1.2 mM NADPH, 1 mM DTT, 8 mM MgCl<sub>2</sub>, 40 mM KHCO<sub>3</sub>, 1 mM ATP, 0 to 10  $\mu$ M PKS<sub>SgcE</sub>, 0 to 50  $\mu$ M TE<sub>SgcE</sub> and 2  $\mu$ M Pcc\* were added to a total of 200  $\mu$ l. The list of enzymes and their amounts are listed in table S5. The assay was performed at 30 °C with shaking at 400 rpm up to 24 h. At specified intervals, the sample was withdrawn and the polyketides are extracted twice the volume with ethyl acetate. After evaporating the organic layer with an upstream flow of nitrogen, the residue was dissolved in 100  $\mu$ l ethyl acetate. For UV-Vis analysis, the extract was measured at 395 nm to detect the formation of pentadecaheptaene **7**. After adding equal volume of methanol to the aqueous layer to precipitate proteins, the mix was spun down at 20,000 g at 4 °C for 10 min. The samples were stored at -80 °C until further analysis. All the reactions were set up in triplicates.

### **Coupling of CETCH and BHAC**

For the coupling of the CETCH with the BHAC we used the same enzyme concentrations of the CETCH core cycle as in<sup>[2]</sup> For the BHAC enzymes and the Mdh we used the amounts as described in ***In vitro* reconstitution of BHAC I** above, except for the BhdD where the amount was increased by a factor of five. MtkAB was added at a concentration of 13.54  $\mu$ M (1 mg/ml) and the glyoxylate reductase at a concentration of 0.62  $\mu$ M (0.020 mg/ml). Other components were added in the following concentrations: 5 mM MgCl<sub>2</sub>, 20 mM polyphosphate, 50 mM sodium bicarbonate, 20 mM sodium formate, 1 mM coenzyme A, 0.1 mM coenzyme B<sub>12</sub>, 5 mM ATP, 5 mM NADPH, 5 mM NADH, 1 mM glycine, 0.1 mM pyridoxalphosphate and 100  $\mu$ M propionyl-CoA as substrate. For the positive control (**Figure S1B (a)**), the enzymes of the CETCH core cycle were used together with the glyoxylate reductase to produce glycolate. To produce acetyl-CoA the enzymes of the CETCH core cycle were combined with BHAC enzymes, and Mdh plus MtkAB (**Figure S1B (c)**). The assays were done in triplicates at 50  $\mu$ l each. 13.5  $\mu$ l samples were taken at 60, 120 and 180 min and quenched in 1.5  $\mu$ l 50% formic acid to stop the reaction. For the split assay, the CETCH core enzymes were used to produce glyoxylate for 60 min. The assay was done in a single assay, split into two batches after 60 min where either the glyoxylate reductase (**Figure S1B (b)**) or the BHAC enzymes, Mdh and MtkAB were added (**Figure S1B (d)**) and then further divided in triplicates to 50  $\mu$ l. Samples were taken as described before at 120 and 180 min. The quenched samples were kept on ice until the end of the experiment and spun down at 20,000 g for 20 min at 4 °C. The supernatant was transferred into fresh tubes and stored at -20 °C until measurement.

### **Coupling of CETCH, BHAC and terpene biosynthetic modules**

The coupling assay was performed in 2 steps by preparing the CETCH-BHAC and the terpene assay mix separately and then mixing equal volume (50  $\mu$ l) of both in one-pot. In 100 mM Hepes buffer pH 7.5, the CETCH-BHAC assay mix contained 5 mM ATP, 5 mM NADPH, 5 mM NADH, 5 mM MgCl<sub>2</sub>, 20 mM polyphosphate, 50 mM bicarbonate, 20 mM formate, 1 mM CoA, 0.1 mM vitamin B<sub>12</sub>, 1 mM glycine, 0.1 mM PLP, and the enzymes with amounts specified in table S5. In 50 mM Tris pH 8.0, the terpenoid assay mix contained 20 mM formate, 3 mM PEP, 10 mM KCl together with the enzymes listed in table S5 including 80  $\mu$ g limonene synthase, 60  $\mu$ g sabinene synthase, 80  $\mu$ g  $\alpha$ -pinene synthase, 40  $\mu$ g  $\alpha$ -bisabolene synthase, 40  $\mu$ g  $\beta$ -farnesene synthase. After mixing both the mixes to 100  $\mu$ l, the reaction was started with 0.1 mM propionyl-CoA and were incubated at 30 °C with shaking at 400 rpm up to 24 h. As positive controls, the CETCH-BHAC and the terpene assays were performed in parallel by adding 0.5 mM acetyl CoA to the latter. At regular intervals, samples were withdrawn from both the positive controls and the tests. Work-up of the samples to detect **1-5** was performed as described in ***In vitro* reconstitution of the terpene biosynthesis modules**. All the reactions were set up in triplicates.

### **Analysis of CO<sub>2</sub> incorporation using <sup>13</sup>C-labeled sodium bicarbonate and sodium formate**

To verify the incorporation of CO<sub>2</sub> by the CETCH cycle as described in Schwander *et al.*,<sup>[2]</sup> we performed the CETCH-BHAC coupling (**Figure 1C**) with 50 mM <sup>13</sup>C-labeled sodium bicarbonate (and carbonic anhydrase) and 20 mM <sup>13</sup>C-labeled sodium formate. <sup>13</sup>C-labeled sodium formate was used to derive <sup>13</sup>CO<sub>2</sub> released by the formate dehydrogenase for NADPH regeneration. All the other components that were present are described in **Coupling of CETCH and BHAC** and the sampling procedure remained the same. Malate-CoA ligase was omitted to produce malate as the final readout. The reaction was started with either 100  $\mu$ M propionyl-CoA (positive control) or ddH<sub>2</sub>O (negative control). For the evaluation by LC-MS, we used a targeted method to quantify the decarboxylated fragment of malate.

## SUPPORTING INFORMATION

**UPLC-MS analysis of malate**

The different fragments of  $^{13}\text{C}$ -labeled malate were measured on a triple quadrupole mass spectrometer (Agilent Technologies 6495 Triple Quad LS/MS) equipped with an UHPLC (Agilent Technologies 1290 Infinity II) using a 150 x 2.1 mm C18 column (Kinetex 1.7  $\mu\text{m}$  EVO C18 100  $\text{\AA}$ ) at 25  $^{\circ}\text{C}$ . The injection volume was 1  $\mu\text{l}$  of the diluted samples (1:25 in water). The flow was set to 0.100 ml/min and the separation was performed using  $\text{dH}_2\text{O}$  with 0.1% formic acid (buffer A) and methanol with 0.1% formic acid (B). Since malate is a dicarboxylic acid and it was unclear which carboxylic group leaves the molecule, we measured all the possible transitions. The parameters for the multiple reaction monitoring (MRMs) are displayed in table S3 and the gradient in table S4. Data analysis was done using the Agilent Mass Hunter Workstation Software.

**Table S3** MRM transitions for decarboxylated fragment of malate

| Compound           | Precursor Ion | Product Ion | Dwell | Fragmentor | Collision Energy | Cell Accelerator Volt. | Polarity |
|--------------------|---------------|-------------|-------|------------|------------------|------------------------|----------|
| Malate +0 (Quant.) | 133           | 89          | 35    | 380        | 11               | 5                      | Negative |
| Malate +0 (Qual.)  | 133           | 133         | 35    | 380        | 0                | 5                      | Negative |
| Malate +1 (Quant.) | 134           | 89          | 35    | 380        | 11               | 5                      | Negative |
|                    | 134           | 90          | 35    | 380        | 11               | 5                      | Negative |
| Malate +1 (Qual.)  | 134           | 134         | 35    | 380        | 0                | 5                      | Negative |
| Malate +2 (Quant.) | 135           | 90          | 35    | 380        | 11               | 5                      | Negative |
|                    |               | 91          | 35    | 380        | 11               | 5                      | Negative |
| Malate +2 (Qual.)  | 135           | 135         | 35    | 380        | 0                | 5                      | Negative |
| Malate +3 (Quant.) | 136           | 91          | 35    | 380        | 11               | 5                      | Negative |
|                    | 136           | 92          | 35    | 380        | 11               | 5                      | Negative |
| Malate +3 (Qual.)  | 136           | 136         | 35    | 380        | 0                | 5                      | Negative |
| Malate +4 (Quant.) | 137           | 92          | 35    | 380        | 11               | 5                      | Negative |
| Malate +4 (Qual.)  | 137           | 137         | 35    | 380        | 0                | 5                      | Negative |

**Table S4** Gradient used for the measurement of the decarboxylated fragments of malate

| Time [min] | A [%] | B [%] |
|------------|-------|-------|
| 0          | 100   | 0     |
| 4          | 100   | 0     |
| 6          | 0     | 100   |
| 7          | 0     | 100   |
| 7.1        | 100   | 0     |
| 12         | 100   | 0     |

**Coupling of CETCH, BHAC and PDH production**

In 100 mM phosphate buffer pH 8.0, 40 mM  $\text{KHCO}_3$ , 2.5  $\mu\text{M}$   $\text{PKS}_{\text{SgcE}}$ , 40  $\mu\text{M}$   $\text{TE}_{\text{SgcE}}$  and 2  $\mu\text{M}$  Pcc\* were added to a total of 50  $\mu\text{l}$ . The list of enzymes and their amounts are listed in table S5. The reaction was initiated by adding equal volume of CETCH-BHAC mix (test) or 1.2 mM acetyl CoA (positive control). The assay was performed at 30  $^{\circ}\text{C}$  with shaking at 400 rpm up to 24 h. At specified intervals, the sample was withdrawn and the polyketides were extracted twice the volume with ethyl acetate. After evaporating the organic layer with an upstream flow of nitrogen, the residue was dissolved in 100  $\mu\text{l}$  ethyl acetate. After adding equal volume of methanol to the bottom aqueous layer to precipitate proteins, the mix was spun down at 20,000 g at 4  $^{\circ}\text{C}$  for 10 min. All the reactions were set up in triplicates.

**UPLC-MS analysis of terpene and polyketide intermediates**

Analysis of the all the terpenes was done in GCMS (Agilent 5973N/6890N single quadrupole) by measuring 1  $\mu\text{l}$  of the samples. An OPTIMA 5 column (30 m long, 0.32 mm inner diameter, 0.25  $\mu\text{m}$  thick) was used for the separation with an initial temperature of 60  $^{\circ}\text{C}$  (2 min hold) followed by a gradient from 20  $^{\circ}\text{C}$  (1 min) to 150  $^{\circ}\text{C}$  then from 40  $^{\circ}\text{C}$  (1 min) to 320  $^{\circ}\text{C}$ . A constant flow rate of 1 ml/min was used. The injector had a temperature of 210  $^{\circ}\text{C}$  and was set for a 1:25 split. The MS had a mass range from 34 to 550 Da covered. The aqueous phase from the independent and coupled terpene experiments was directly analysed for the isoprenoid intermediates using UPLC-high resolution mass spectrometer (Orbitrap IDXTM) set to negative ionisation mode. SeQuant ZIC-pHILIC (150 x 4.6 mm) was used for separating the isoprenoid intermediates. UPLC conditions: isocratic elution (10 mM ammonium carbonate and 118 mM ammonium hydroxide in acetonitrile:water (60.1:39.8)) for 10 min at a flow rate of 0.45 ml/min; injection volume: 3  $\mu\text{l}$ ; mass range: 65 – 1100  $m/z$ ). For the analysis of polyketides, both the organic and aqueous phases were analysed directly using UPLC-high resolution mass spectrometer (Orbitrap IDXTM) set to positive ionisation mode. Kinetic EVO C18 column (50 x 2.1 mm) was used for the separation of the polyketide intermediates. UPLC conditions: 95 % of 0.1 % formic acid in water (Solvent A) for 2 min; 5 – 95 %

## SUPPORTING INFORMATION

0.1 % formic acid in acetonitrile (Solvent B) for 2 – 11 min; 95 % B at 12 min; 95 % until 14 min. flow rate: 0.25 ml/min; injection volume: 5  $\mu$ L; mass range: 100 – 1100  $m/z$ .

## Supplementary text

### Optimization of CETCH, summarized from earlier publications

CETCH had been optimized earlier in several rounds (CETCH 1.0 to CETCH 5.4).<sup>[2]</sup> All versions of CETCH were tested in buffer containing 50 mM sodium bicarbonate which was further equilibrated with carbonic anhydrase to provide CO<sub>2</sub> in a dissolved form to the assay. In CETCH 2.0, methylsuccinyl-CoA dehydrogenase was engineered into a methylsuccinyl-CoA oxidase (Mco) to catalyze the oxidation of methylsuccinyl-CoA with molecular oxygen, which allowed CETCH to turn multiple times as shown by <sup>13</sup>C-labeling experiments. In CETCH 3.0, a read-out module was introduced to convert glyoxylate to malate that allowed a better quantification of CETCH assays. Also, an engineered formate dehydrogenase was used to regenerate the cofactor NADPH and (simultaneously) CO<sub>2</sub> in the assay. In CETCH 4.0, to protect the cofactors and intermediates and to prevent the oxidative damage from H<sub>2</sub>O<sub>2</sub> (produced by Mco), catalase (KatE) was added which resulted in increased efficiency in CO<sub>2</sub> fixation. In CETCH 5.0, to maintain a stable ATP pool and to regenerate ATP for Hbs, a polyphosphate transferase (Ppk) was included that increased the efficiency of the cycle to fix 4.3 CO<sub>2</sub>-equivalents per acceptor molecule in 90 min. Finally, after further improvements to the cycle (optimizing Ccr), the efficiency of CETCH 5.4 reached a maximum of 5.4 fixed CO<sub>2</sub>-equivalents per acceptor in 90 min. The CETCH cycle reached a plateau after 90 min and malate production could not be increased beyond 540  $\mu$ M, indicating that malate inhibits CETCH cycle enzymes.

### Optimization of BHAC, this work

To establish and optimize the BHAC, we reconstituted the BHAC *in vitro* using N-terminal His-tagged proteins, produced in *E. coli*. To test the functioning of the BHAC cycle, we started the reaction with 500  $\mu$ M glyoxylate and monitored the formation of malate from oxaloacetate, using malate dehydrogenase (Mdh) over time. Note that  $\beta$ -hydroxyaspartate aldolase (BhcC), the first enzyme reaction of the BHAC that catalyzes the aldol condensation of glyoxylate with glycine, has an apparent  $K_m$  of  $4.3 \pm 0.3$  mM for glycine.<sup>[3]</sup> Thus, while providing high glycine concentrations might facilitate the first reaction, it might also lead to a faster depletion of glyoxylate, which is required in the last step as acceptor for aspartate-glyoxylate aminotransferase (BhcA), eventually creating a bottleneck. To optimize BHAC productivity, we initially tested two different glycine (0.5 mM and 5 mM), as well as two different BhcA (0.79  $\mu$ M and 19.83  $\mu$ M) concentrations. However, over the course of 90 min, total malate yields were comparable between the different conditions tested (~70%), indicating that the BhcC was operating robustly across a wide range of co-substrate and BhcA concentrations *in vitro* (Figure S1A).

## SUPPORTING INFORMATION

## Supporting Figures and Tables

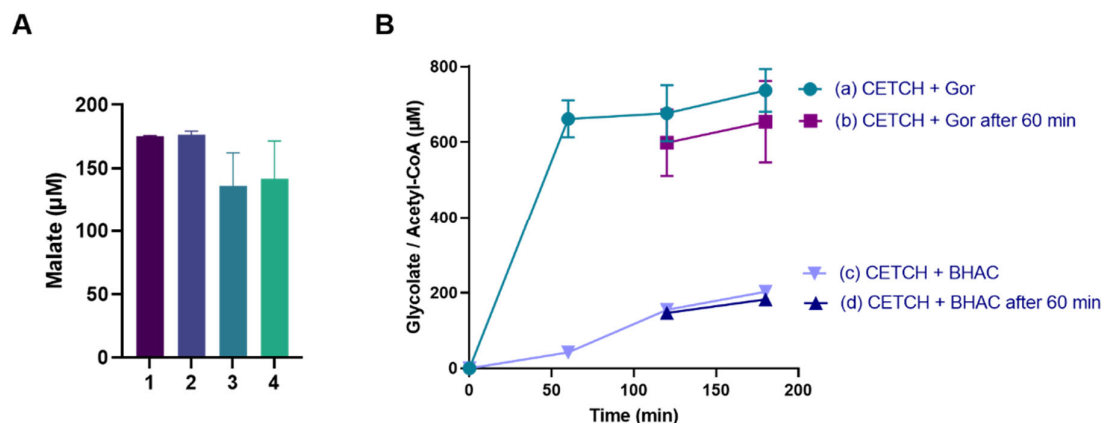

**Figure S1** BHAC reconstitution and coupling to CETCH cycle for acetyl-CoA production. **A)** Malate production by the BHAC after 90 min. The general setup is described in: *In vitro* reconstitution of BHAC. All the reactions were started with 500 µM glyoxylate. With this setup, we tested different BhcA and glycine concentrations: 1) 0.5 mM glycine and 0.79 µM (0.043 mg/ml) BhcA, 2) 5.0 mM glycine and 0.79 µM (0.043 mg/ml) BhcA, 3) 0.5 mM glycine and 19.83 µM (0.890 mg/ml) BhcA and 4) 5.0 mM glycine and 19.83 µM (0.890 mg/ml) BhcA. The data represent  $n=2 \pm$  standard deviation. **B)** Acetyl-CoA vs. glycolate production by the CETCH (+BHAC). The general setup is described in: **Coupling of CETCH and BHAC**. All the reactions were started with 100 µM propionyl-CoA. In this setup we tested whether the low acetyl-CoA yield is due to interference of the BHAC enzymes with the core cycle or due to intermediate drainage. (a) CETCH core cycle with Glyoxylate reductase (Gor). (b) Glyoxylate reductase added after 60 min. (c) BHAC enzymes, Mdh and MtkAB added after 60 min. (d) CETCH with BHAC enzymes, Mdh and MtkAB. The data represent  $n=3 \pm$  standard deviation.

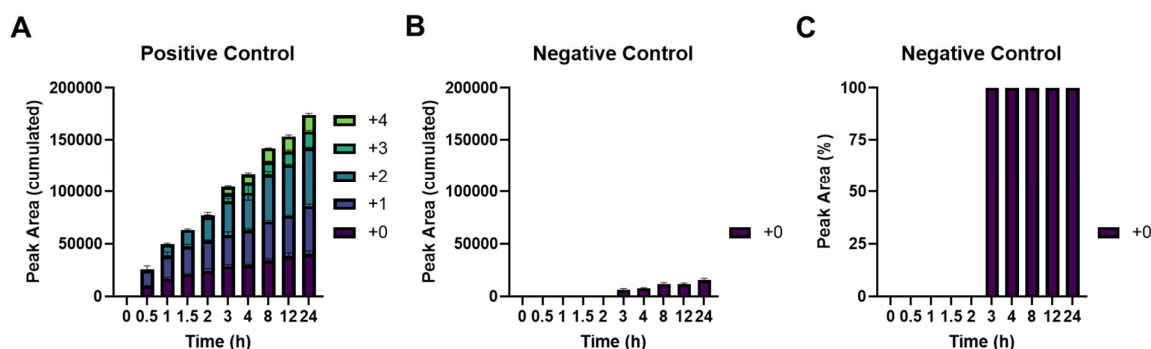

**Figure S2** Fractional labeling of malate by incorporation of  $^{13}\text{CO}_2$ . +0, +1, +2, +3, +4 indicates the number of  $^{13}\text{C}$  are incorporated into malate. To verify the incorporation of  $\text{CO}_2$  by the CETCH cycle we repeated the CETCH-BHAC coupling (Figure 1C) with 50 mM  $^{13}\text{C}$ -labeled sodium bicarbonate (and carbonic anhydrase) and 20 mM  $^{13}\text{C}$ -labeled sodium formate.  $^{13}\text{C}$ -labeled sodium formate was used to derive  $^{13}\text{CO}_2$  released by the formate dehydrogenase for NADPH regeneration. In the first three turns of the CETCH cycle only single labeled glyoxylate is produced while the second  $^{13}\text{CO}_2$  derived carbon is incorporated into CETCH cycle intermediates.<sup>[2]</sup> For the formation of oxaloacetate and therefore malate by the BHAC, initially added glycine is used. Since the last reaction in the BHAC for the production of oxaloacetate requires another molecule of glyoxylate generated from fixed  $\text{CO}_2$ , a single labeled molecule of malate is stoichiometrically completely build from fixed  $\text{CO}_2$ . **A)** Total level of malate dissected into the labeled fractions. For fractional labeling of the positive control see Figure 1D. **B)** Fractional labeling in percentage of the negative control containing buffer. **C)** Total malate in the negative control. The data represent  $n=3 \pm$  standard deviation.



## SUPPORTING INFORMATION

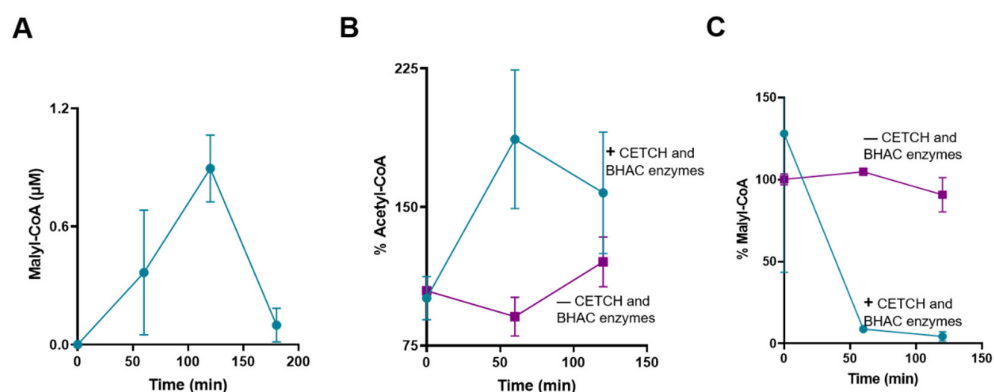

**Figure S3** Profile of CoA esters in the CETCH-BHAC coupled assay. **A)** Residual concentration of malyl-CoA in the assay shown in Figure S1B (c). Stability of **B)** acetyl-CoA and **C)** malyl-CoA under assay conditions described in **Coupling of CETCH and BHAC**. All enzymes and cofactors except Mcl (to avoid the cleavage of malyl-CoA) was added to the positive control (+). Only the cofactors are added to the negative control (—). 100% corresponds to 300 µM of acetyl- and malyl-CoA. While acetyl-CoA was stable, malyl-CoA was depleted in less than 60 min. The data represent  $n=2 \pm$  standard deviation.

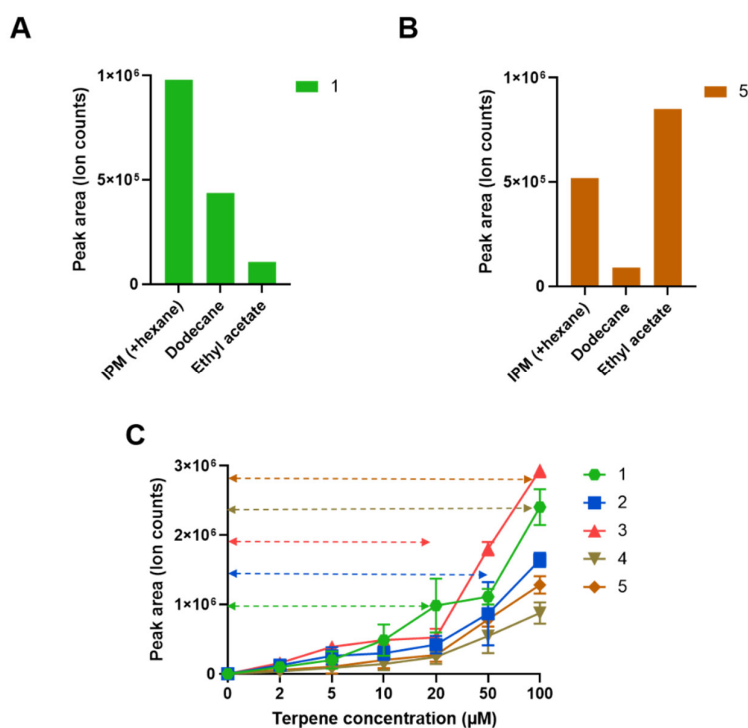

**Figure S4** Optimization of terpene extraction in different solvents as measured by GCMS. Comparison of yield of **A)** 50 µM limonene (1) (representation) and **B)** 50 µM β-farnesene (5) (representation) with different organic solvents. IPM: isopropylmyristate. 30 µl IPM was added as an overlay to a 100µl standard + buffer mix. After a brief incubation, the IPM layer was carefully withdrawn and diluted with hexane before measurement using GCMS. Similarly, 10 % dodecane was also tested as an overlay to trap the terpenes. The withdrawn dodecane layer was further diluted with ethyl acetate for GCMS measurement. As a third solvent, 2x volumes of ethyl acetate (200 µl to a 100 µl standard + buffer mix) was tested. Followed by centrifugation at 20,000 g for 15 min at 4 °C, the organic phase was directly used for GCMS measurement. IPM resulted in maximum trapping of monoterpenes 1-3 which was routinely used for subsequent measurements. For sesquiterpenes 4-5, ethyl acetate was the best solvent. **C)** Measurement of terpene standards by GCMS. The linear range used for quantification of the corresponding terpenes is shown as dashed double-headed lines.

## SUPPORTING INFORMATION

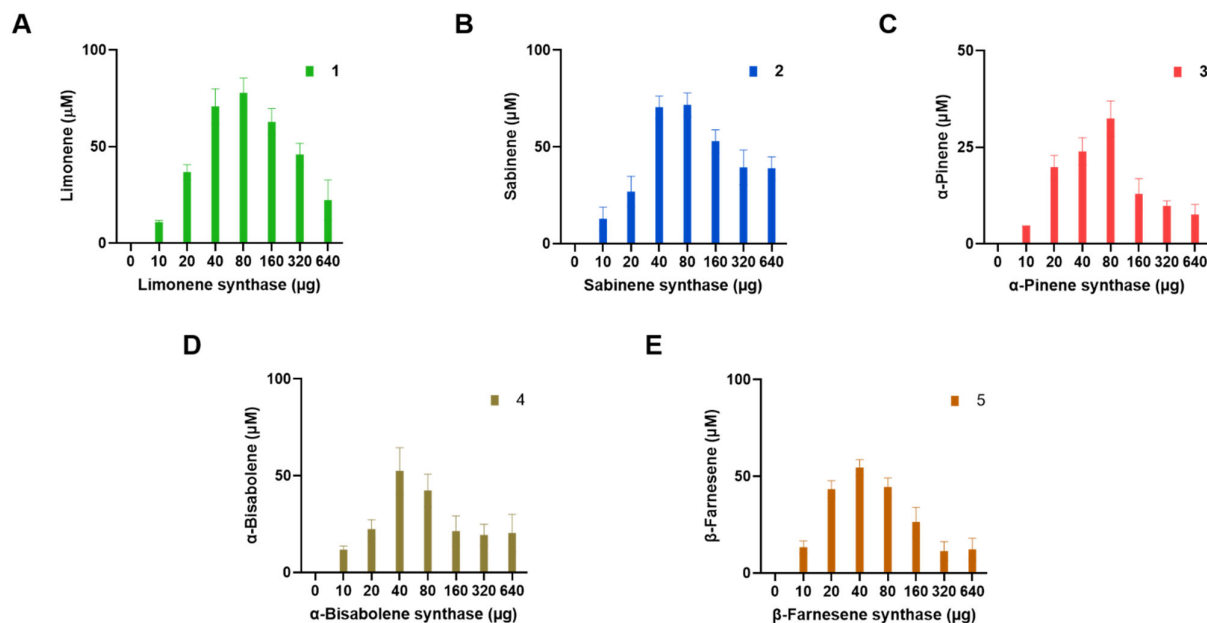

**Figure S5** Comparison of different terpene synthase concentration (0 to 640 µg) for the production of terpenes and measurement by GCMS. The reaction is started with 0.5 mM acetyl CoA and run at 30 °C for 24 h. The extraction of monoterpenes 1-3 was done using isopropylmyristate overlay followed by dilution with hexane while sesquiterpenes 4-5 were extracted using 2x volumes of ethylacetate. The concentration of individual terpenes was quantified using the standard graph (Figure S4C linear range). The concentration at which maximum terpene production was observed has been chosen for the subsequent analysis.

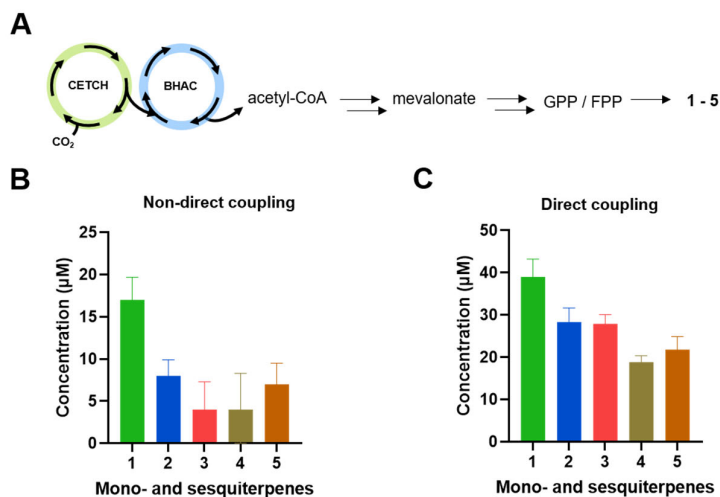

**Figure S6 A)** General scheme of the assay as described in methods section 'Coupling of CETCH, BHAC and terpene biosynthetic modules'. Net production of terpenes in non-direct vs. direct coupling assay in 24 h. **B)** The CETCH-BHAC assay is first run independently for 4 h to which the terpene assay mix was subsequently added. In this non-direct coupling assay, the overall yield of monoterpenes 1-3 and sesquiterpenes 4-5 were below 20 µM. **C)** CETCH-BHAC cascade and terpene biosynthesis modules were operated in a single pot continuously. In this direct coupling approach, the net yield of terpenes improved 3- to 4-fold.

## SUPPORTING INFORMATION

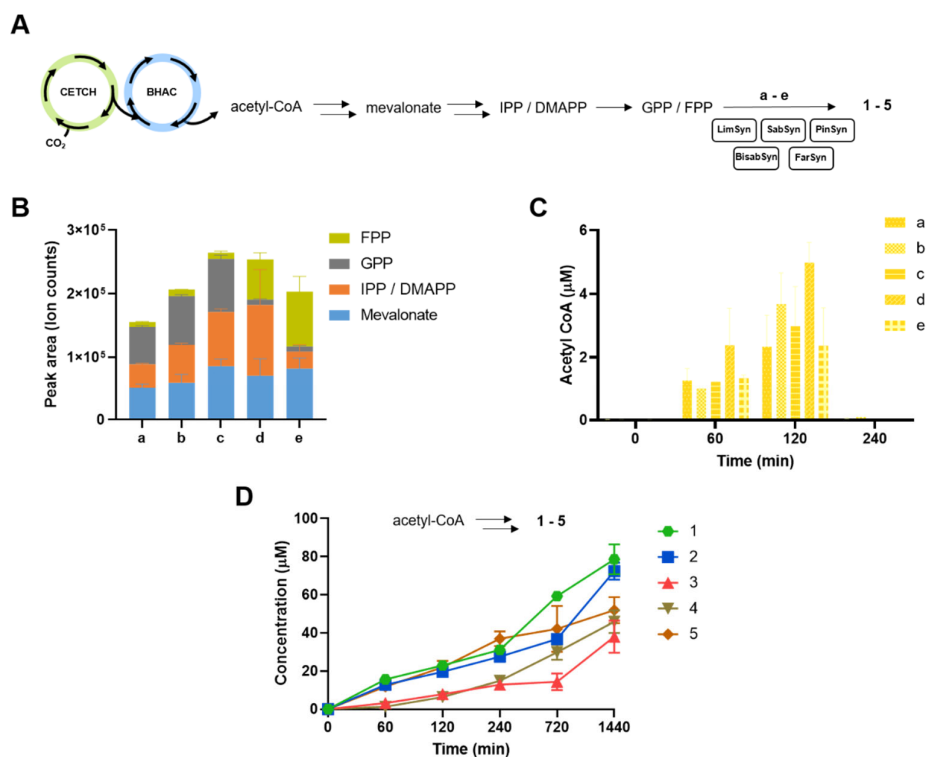

**Figure S7** A) General scheme of the direct coupling assay as described in methods section 'Coupling of CETCH, BHAC and terpene biosynthetic modules'. a, b, c, d, e refers to individual reactions with limonene synthase, sabinene synthase,  $\alpha$ -pinene synthase,  $\alpha$ -bisabolene synthase and  $\beta$ -farnesene synthase respectively. B) Accumulation of mevalonate pathway intermediates measured by LCMS at 24 h. Equal volume of methanol was added to the final assay mix to stop the reaction and to precipitate the proteins. After centrifugation at 20,000 g for 15 min at 4°C, the supernatant was used directly to measure by LCMS. C) Concentration of residual acetyl-CoA measured over 4 h. From 4 h, only negligible amounts of acetyl-CoA could be detected. D) Acetyl CoA to terpenes as a positive control. The reaction is started with 0.5 mM acetyl-CoA.

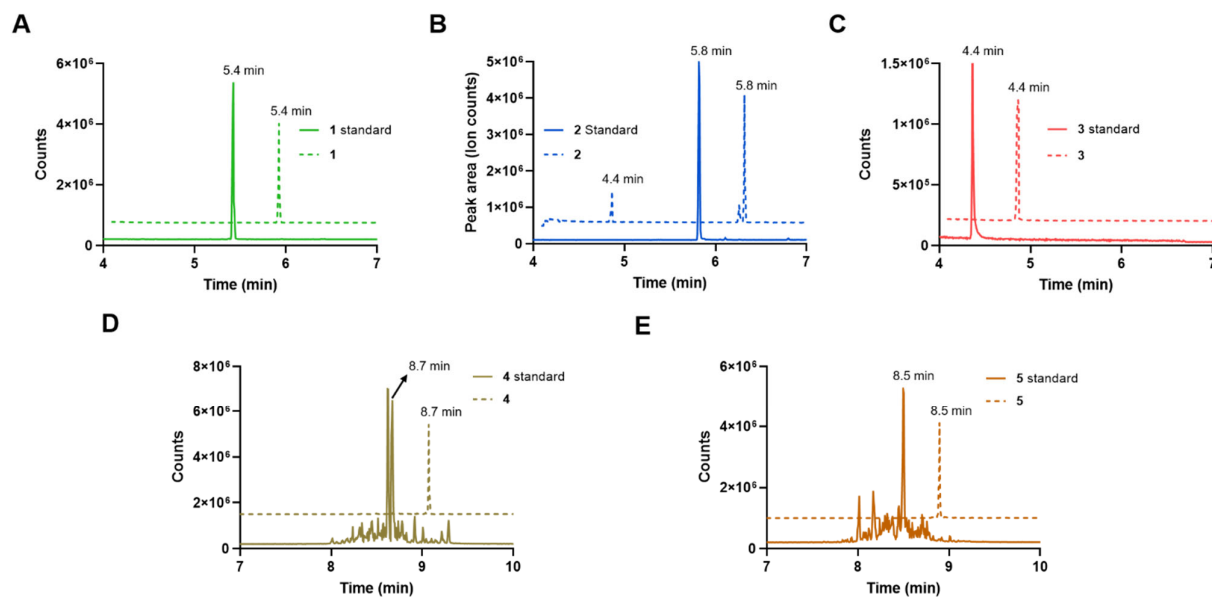

**Figure S8** GCMS analysis of the production of mono- and sesquiterpenes from the CETCH-BHAC-terpene coupled assay (refer figure 2C) and comparison with authentic standards. The assay is performed as described in the methods section 'Coupling of CETCH, BHAC and terpene biosynthetic modules'. For clarity, only the traces at 24 h time point are shown. A) Representative trace of limonene (1) from 100  $\mu\text{M}$  propionyl-CoA. B) Representative trace of sabinene (2). A fraction of  $\alpha$ -pinene (3) was also observed at a retention time of 4.4 min. C) Representative trace of  $\alpha$ -pinene (3). D) Representative trace of  $\alpha$ -bisabolene (4). The bisabolene standard come as a mixture of isomers however, exclusively  $\alpha$ -bisabolene is observed in the GCMS trace in the assay sample. E) Representative trace of  $\beta$ -farnesene (5).

## SUPPORTING INFORMATION

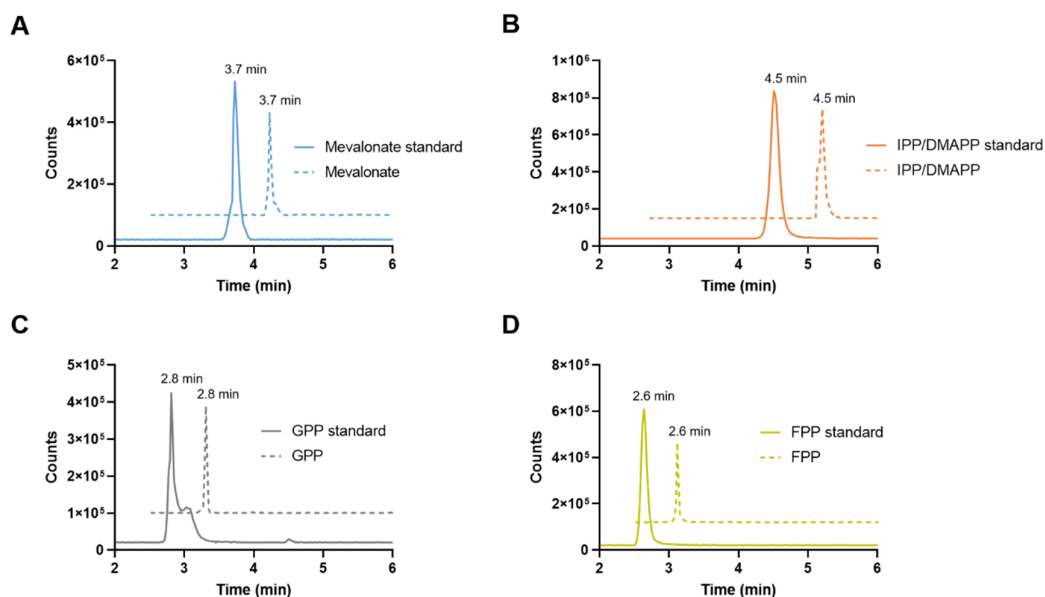

**Figure S9** LCMS analysis of the terpene intermediates from the CETCH-BHAC-terpene coupled assay (refer figure 2C) and comparison with authentic standards. Representative traces of **A**) mevalonate, **B**) IPP/DMAPP, **C**) GPP and **D**) FPP. IPP and DMAPP could not be separated even after optimizing the chromatographic method. Equal volume of methanol was added to the final assay mix (and the standards, as a positive control) to stop the reaction and to precipitate the proteins. After centrifugation at 20,000 g for 15 min at 4°C, the supernatant was used directly to measure by LCMS.

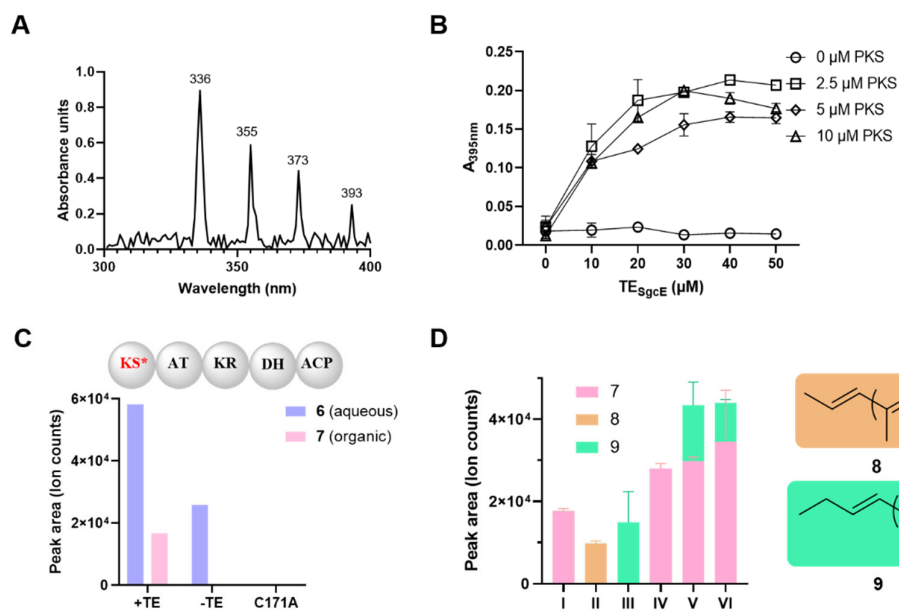

**Figure S10** **A**) UV-Vis profile of pentadecaheptaene (**7**). **7** exhibited a spectrum typical of a polyene with multiple absorption maxima between 300 and 400 nm. **B**) Absorbance of the ethyl acetate extracts from the PKS enzymatic assay at 395 nm. The production of **7** at various PKS<sub>SgGE</sub> and TE<sub>SgGE</sub> concentrations is shown. 2.5 μM PKS<sub>SgGE</sub> and 40 μM PKS<sub>TE</sub> was used for the subsequent analysis. **C**) Analysis of the KS<sub>C171A</sub> mutant. Compared to the positive control (+TE), neither the production of **6** nor **7** was observed. **D**) Formation of substituted heptaenes (**8** and **9**) from 100 μM propionyl-CoA in the CETCH-BHAC-PKS coupled assay, using different extender units. I: malonyl-CoA (positive control); II: methylmalonyl-CoA; III: ethylmalonyl-CoA; IV: malonyl- + methylmalonyl-CoA; V: malonyl- + ethylmalonyl-CoA; VI: malonyl- + methylmalonyl- + ethylmalonyl-CoA. All the assays were performed in triplicates and the mean ± S.D. are plotted.

## SUPPORTING INFORMATION

Table S5. List of enzymes used in the study

| Cycle/pathway | Abbreviation | Full name                                  | Source                       | Vector                | Tag   | Origin Reference                   |
|---------------|--------------|--------------------------------------------|------------------------------|-----------------------|-------|------------------------------------|
| CETCH         | Pco          | Propionyl-CoA oxidase                      | <i>A. thaliana</i>           | pET16b                | His   | [2]                                |
| CETCH         | Ccr          | Crotonyl-CoA carboxylase/reductase         | <i>M. extorquens</i>         | pET16b                | His   | [2]                                |
| CETCH         | Epi          | Epimerase                                  | <i>R. sphaeroides</i>        | pET16b                | His   | [6]                                |
| CETCH         | Mcm          | Methylmalonyl-CoA mutase                   | <i>R. sphaeroides</i>        | pET16b                | His   | [7]                                |
| CETCH         | Scr          | Succinyl-CoA reductase                     | <i>C. kluyveri</i>           | pCDF-Duet-1           | His   | [2]                                |
| CETCH         | Ssr          | Succinic semialdehyde reductase            | <i>H. sapiens</i>            | p2BP1                 | His   | [2]                                |
| CETCH         | Hbs          | 4-hydroxybutyryl-CoA synthetase            | <i>N. maritimus</i>          | pET16b                | His   | [8]                                |
| CETCH         | Hbd          | 4-hydroxybutyryl-CoA dehydratase           | <i>N. maritimus</i>          | pRSET-B               | His   | [2]                                |
| CETCH         | Ecm          | Ethylmalonyl-CoA mutase                    | <i>R. sphaeroides</i>        | pET16b                | His   | [6]                                |
| CETCH         | Mco          | Methylsuccinyl-CoA oxidase                 | <i>R. sphaeroides</i>        | pET16b                | His   | [2]                                |
| CETCH         | Mch          | Mesaconyl-CoA hydratase                    | <i>R. sphaeroides</i>        | pET16b                | His   | [9]                                |
| CETCH         | Mcl          | Malyl-CoA/citramalyl-CoA lyase             | <i>R. sphaeroides</i>        | pET16b                | His   | [10]                               |
| CETCH         | KatE         | Catalase                                   | <i>E. coli</i>               | pCAN24N (ASKA JW1721) | His   | [4]                                |
| CETCH         | Fdh          | Formate dehydrogenase (D221A)              | <i>M. vaccae</i>             | pET21a                | His   | [11]                               |
| CETCH         | smPPK2-I     | Polyphosphate kinase ADP - ATP             | <i>S. meliloti</i>           | pET28a                | His   | [2]                                |
| CETCH         | Gor          | Glyoxylate/succinic semialdehyde reductase | <i>G. oxidans</i>            | pTE1125               | Strep | Gift from Martina Carrillo Camacho |
| BHAC          | BhcA         | Aspartate glycine aminotransferase         | <i>P. denitrificans</i>      | pET16b                | His   | [3]                                |
| BHAC          | BhcD         | Iminosuccinate reductase                   | <i>P. denitrificans</i>      | pET16b                | His   | [3]                                |
| BHAC          | BhcB         | Beta-hydroxyaspartate dehydratase          | <i>P. denitrificans</i>      | pET16b                | His   | [3]                                |
| BHAC          | BhcC         | Beta-hydroxyaspartate aldolase             | <i>P. denitrificans</i>      | pET16b                | His   | [3]                                |
| BHAC          | Mdh          | Malate dehydrogenase                       | <i>E. coli</i>               | pCAN24N (ASKA JW3205) | His   | [4]                                |
| BHAC          | MtkAB        | Malate thiokinase                          | <i>M. extorquens</i>         | pET28b                | His   | Gift from Thomas Schwander         |
| Terpene       | PhaA         | Acetyl - CoA acetyltransferase             | <i>C. necator</i>            | pET28a                | His   | [12]                               |
| Terpene       | Hmgs         | HMG-CoA synthase (A110G)                   | <i>E. faecalis</i>           | pET28a                | His   | [12]                               |
| Terpene       | Hmgr         | HMG-CoA reductase                          | <i>E. faecalis</i>           | pET28a                | His   | [12]                               |
| Terpene       | Mvk          | Mevalonate kinase                          | <i>M. mazei</i>              | pET28a                | His   | [12]                               |
| Terpene       | Pmvk         | Phosphomevalonate kinase                   | <i>S. pneumoniae</i>         | pET28a                | His   | [12]                               |
| Terpene       | Mdc          | Mevalonate-PP decarboxylase                | <i>S. pneumoniae</i>         | pET28a                | His   | [12]                               |
| Terpene       | Idi          | Isopentenyl-PP isomerase                   | <i>E. coli</i>               | ASKA JW2857           | His   | [4]                                |
| Terpene       | Gpps         | Farnesyl-PP synthase (S82F)                | <i>G. stearothermophilus</i> | pET28a                | His   | [12]                               |
| Terpene       | IspA         | Farnesyl-PP synthase                       | <i>E. coli</i>               | pET28a                | His   | [4]                                |
| Terpene       | LimSyn       | (+)-Limonene synthase                      | <i>M. spicata</i>            | pET28a                | His   | [12]                               |
| Terpene       | SabSyn       | Limonene synthase (N345A)                  | <i>M. spicata</i>            | pET28a                | His   | [12]                               |

## SUPPORTING INFORMATION

|         |                     |                                       |                       |        |     |                        |
|---------|---------------------|---------------------------------------|-----------------------|--------|-----|------------------------|
| Terpene | PinSyn              | $\alpha$ -Pinene synthase             | <i>P. sitchensis</i>  | pET28a | His | [12]                   |
| Terpene | BisabSyn            | $\alpha$ -Bisabolene synthase         | <i>A. grandis</i>     | pET28a | His | Synthesized gene       |
| Terpene | FarSyn              | $\beta$ -Farnesene synthase           | <i>M. piperita</i>    | pET28a | His | Synthesized gene       |
| Terpene | PK/LDH              | Pyruvate kinase/lactate dehydrogenase | <i>Sigma</i>          |        |     |                        |
| PKS     | PKS <sub>SgcE</sub> | C-1027 polyketide synthase            | <i>S. globisporus</i> | pET28a | His | Synthesized gene       |
| PKS     | TE <sub>SgcE</sub>  | C-1027 thioesterase                   | <i>S. globisporus</i> | pET28a | His | Synthesized gene       |
| PKS     | Pcc*                | Propionyl-CoA carboxylase (D4071)     | <i>M. extorquens</i>  | JZ105  | His | Gift from Jan Zarzycki |

Table S6. Kinetic data of enzymes

| Cycle/pathway | Abbreviation <sup>[a]</sup> | mg mL <sup>-1</sup> | mg in assay <sup>[b]</sup> | V <sub>max</sub> (U mg <sup>-1</sup> ) | K <sub>M</sub> (mM) | U ml <sup>-1</sup> assay | Reference   |
|---------------|-----------------------------|---------------------|----------------------------|----------------------------------------|---------------------|--------------------------|-------------|
| CETCH         | Pco                         | 2.5                 | 0.007                      | 12                                     | 0.044               | 0.8                      | [2]         |
| CETCH         | Ccr                         | 6.1                 | 0.001                      | 110                                    | 0.17                | 1                        | [2]         |
| CETCH         | Epi                         | 5.0                 | 0.0005                     | 440                                    | 0.08                | 2                        | [6]         |
| CETCH         | Mcm                         | 4.8                 | 0.001                      | 20                                     | 0.14                | 0.2                      | [7]         |
| CETCH         | Scr                         | 15.1                | 0.007                      | 29                                     | 0.003               | 2                        | [13]        |
| CETCH         | Ssr                         | 8.3                 | 0.001                      | 3.9                                    | 0.013               | 0.04                     | [2]         |
| CETCH         | Hbs                         | 14.1                | 0.02                       | 2                                      | 0.19                | 0.4                      | [8]         |
| CETCH         | Hbd                         | 8.8                 | 0.002                      | 26                                     | 0.06                | 0.5                      | [8]         |
| CETCH         | Ecm                         | 8.4                 | 0.002                      | 7                                      | 0.06                | 0.1                      | [6]         |
| CETCH         | Mco                         | 35.0                | 0.07                       | 0.1                                    | 0.03                | 0.07                     | [2]         |
| CETCH         | Mch                         | 4.5                 | 0.005                      | 1500                                   | n.d.                | 75                       | [9]         |
| CETCH         | Mcl                         | 5.9                 | 0.025                      | 5                                      | 0.01                | 1                        | [10]        |
| CETCH         | KatE                        | 27.6                | 0.006                      | 11740                                  | 86.5                | 704                      | [14]        |
| CETCH         | Fdh                         | 27.0                | 0.03                       | 1.4                                    | 0.37                | 0.4                      | [4]         |
| CETCH         | smPPK2-I                    | 7.5                 | 0.004                      | 12                                     | 0.032               | 0.5                      | [15]        |
| CETCH         | Gor                         | 3.65                | 0.001                      | n.d.                                   | n.d.                |                          | unpublished |
| BHAC          | BhcA                        | 2.7                 | 0.005                      | 116                                    | 0.23                | 6                        | [3]         |
| BHAC          | BhcD                        | 5.8                 | 0.003                      | 57                                     | 0.2                 | 2                        | [3]         |
| BHAC          | BhcB                        | 36.3                | 0.025                      | 358                                    | 0.09                | 90                       | [3]         |
| BHAC          | BhcC                        | 43.4                | 0.004                      | 1                                      | 2.9                 | 0.04                     | [3]         |
| BHAC          | Mdh                         | 23                  | 0.002                      | 1611                                   | 0.04                | 32                       | [16]        |
| BHAC          | MtkAB                       | 10.2                | 0.05                       | n.d.                                   | n.d.                |                          | unpublished |
| Terpene       | PhaA                        | 19                  | 0.002                      | 81                                     | 0.4                 | 2                        | [12]        |
| Terpene       | Hmgs                        | 10                  | 0.005                      | 1.5                                    | 0.01                | 0.08                     | [12]        |
| Terpene       | Hmgr                        | 3.6                 | 0.03                       | 4                                      | 0.02                | 1.2                      | [12]        |
| Terpene       | Mvk                         | 17.9                | 0.005                      | 8                                      | 0.07                | 0.4                      | [12]        |
| Terpene       | Pmvk                        | 18.6                | 0.005                      | 15                                     | 0.008               | 0.8                      | [12]        |
| Terpene       | Mdc                         | 11.8                | 0.03                       | 4                                      | 0.1                 | 1.2                      | [12]        |

## SUPPORTING INFORMATION

|         |                     |             |        |      |        |     |      |
|---------|---------------------|-------------|--------|------|--------|-----|------|
| Terpene | Idi                 | 4.6         | 0.025  | 2.1  | 0.0035 | 0.5 | [17] |
| Terpene | Gpps                | 10          | 0.005  | 7    | 0.005  | 0.4 | [12] |
| Terpene | IspA                | 9.5         | 0.005  | n.d. | n.d.   |     |      |
| Terpene | LimSyn              | 34          | 0.08   | n.d. | n.d.   |     | [12] |
| Terpene | SabSyn              | 29          | 0.06   | n.d. | n.d.   |     | [12] |
| Terpene | PinSyn              | 19          | 0.08   | n.d. | n.d.   |     | [12] |
| Terpene | BisabSyn            | 29          | 0.04   | n.d. | n.d.   |     |      |
| Terpene | FarSyn              | 9           | 0.04   | n.d. | n.d.   |     |      |
| Terpene | PK/LDH              | 1U/ $\mu$ l | 0.0005 | n.d. | n.d.   |     |      |
| PKS     | PKS <sub>SgcE</sub> | 20.2        | 0.03   | n.d. | n.d.   |     |      |
| PKS     | TE <sub>SgcE</sub>  | 15          | 0.06   | n.d. | n.d.   |     |      |
| PKS     | Pcc*                | 3.1         | 0.03   | n.d. | n.d.   |     |      |

[a] Refer to Table S3 for enzyme name and source [b] Amount corresponds to 100  $\mu$ l assay volume

**Table S7** Synthesized genes

### $\beta$ -Farnesene synthase

GCTAGCATGGCGACTAACGGCGTAGTGATTAGCTGCCTGCGTGAAGTGAGACCGCGATGACTAAACATGCGCCTAGCATGTGGACTGACACCTTCTCTAAC  
 TTTAGTCTTGATGATAAAGAGCAACAGAAATGTAGTGAAACCATTGAAGCACTGAAACAGGAAGCGCGCGGTATGCTGATGGCTGCTACCACTCCACTGCAGC  
 AGATGACCCTGATCGACACCTGGAACGTCTGGTCTGTCCCTCCATTTCGAAACCGAAATCGAATATAAAATTGAAGTATCAACGCTGCTGAAGACGACGG  
 TTTCGACCTGTTTGGCACCCTGCTGCGTTCCGCTGCTGCGTACGACCAGCGTCATGTTTCTGTGACGTTTTCGATAAATTCATCGATAAAGATGGTAAT  
 TCGAAGAATCTCTGTCTAACACCGTTGGTGGCCTGCTGTCCCTGTACGAAGTTGCCACGTTGGGTTCCGTTGAAAGAAGCGCATCCTGCAGGAAGCTGTGAAC  
 TCACCCGTCACCACCTGGAAGGTGCTGAAGTGCACAGAGCCGCTGCTGATCCGTGAAAAAGTTAAACGTTGCGCTGGAACACCCGCTGCACCGTGACTTC  
 CCGATAGTCTACGCACGCTGTTCATCTCTATTTATGAAAAGGACGACTCGCGCGATGAAGTGTGCTGAAACTCAGTAAGGTGAACCTTTAAATTTATGCAGAA  
 CCTGTATAAAGAAGAACTGTCTCAGCTGTCTGTTGGTGAACACCTGGAACCTGAAATCTAACTGCCGTATGCACGTGATCGTGTGTTGAAGCATACGTTT  
 GGGGCGTTGGTTACCACTACGAACCCGACTACTCTATGTTTCGTATGGGTCTGGCTAAAGGTGTTCTGATCTGCGGTATTATGGATGACACCTATGACAACTA  
 CGCTACCCTGAACGAAGCAGACTGTTACCCAGGTTCTGGATAAATGGGATCGTGACGAAGCGGAACGCTCTGCCGGAATACATGAAAATCGTTTACCGTTT  
 CATCCTGTCTATCTACGAAAACACGAACGTGATGCTGCGAAACTGGGTAATCCTTCGCTGCTCCGTACTTCAAAGAAACCGTGAACACGCTGGCGCGTGCA  
 TTCAACGAAGAAGCAGAAATGGTAATGGAACGTCAGCTGCCGCTCCAGGACTACGTGAAAAACAGTGAAAAAACCTCCTGCATCTACACCATGTTCCGGA  
 GCATCATCCAGGCTGAAATCCGTTACCCAGGAAACCATCGACTGGATCAAACTGAAACCGACCTGGCAACCTCTACCGCATGATCGGTGCTACTGGA  
 ACGATTGCGAGCTCTCAGCTGCGTGAATCTAAAGGCGGTGAAATGCTGACCGCTCGGACTTCCACATGAAAGAATACCGTCTGACCAAGAAAGAACTGGCT  
 CTAATTCGAAGGCTGTGGAAAGAACTGGAAAGATATCAAAAGAATTCTCGCGACCACTAACTACAACGTTGGCGGTGAAATCGCTATCACCTTCT  
 GAACTACGCGGTATCTCGGAAGCAAGCTATAGCAAAACCGACGGTGACGCGTACAGCGATCCGAACGTTGCGAAAGCGAACGTTGTGGCGCTGTTCTGTTG  
 ATGCTATCGTTTTCTAAGTCGAC

### $\alpha$ -Bisabolene synthase

CAGTCCCGCAGACCGTTGATTGGATTCTTAAAAACAGTTGAAAGATGGCAGCTGGGCGATTGAGTCCCACTTCTGCTGTCTGACCGTCTCCTGGCCACTC  
 TGCTTGGCTGCTGGTTCTGCTGAAATGGAACGTTGGCGACCTGCAAGTTGAACAGGGCATCGAATTCATTAATCTAACCTGGAACCTGGTTAAAGATGAAAC  
 TGATCAGGATTCTTGTAACTGACTTCGAAATCATCTTCCGTCCTGCTGCGTGAAGCGCAGTCTCTGCGTCTCGGCCTGCCCTTATGACCTGCCGTACATC  
 CATCTGCTGCAGACTAACGCCAGGAACGCTCTGGCAAACTGAGCCGTGAAGAAATTTACGCGGTTCCGAGCCCGCTGCTGACTCTCTGGAAGGTATCCAG  
 GACATCGTAGAATGGGAACGCATCATGGAAGTTCAATCCAGGATGGTAGCTTCTGAGCTCTCCGCTAGCACTGCATGCGCTTTTATGCACACCGGTGAC  
 GCTAAATGCCTGGAATCTGAACTCCGTAATGATCAAAATTTGTAACCTTCCGTCGCTGTACCCGCTAGATCTCCTGGAACGCTGCTGATTGTTGACAA  
 CATCGTGGCGCTGGTATCTACCGTCAATTTGAAAAAGAAATCAAGAAGCACTGGACTACGTTTACCGTCACTGGAACGAACGTTGGCATCGGCTGGGCGCG  
 CCTGAATCCGATTGCGACCTGGAACCCCGCTCTGGGCTTTCCGCTGCTGCGCCTGCACCGCTACAACGTTTCCCGGCAATCTTCGACAACCTCAAAGA  
 TGCTAATGGTAAATTCATCTGCTCCACCGGTGAGTTTAAACAAAGATGTAGCGTCCATGCTGAACCTCTACCGCGCTTCCAGCTGGCGTTTCCGGGTGAAAC  
 ATCCTCGATGAAGTAAATCCTTCCGACCAAAATATCTGCGTGAAGCCTTGGAAAAATCTGAACACAGCAGCGCTTGAACAACAAGCAAAACCTGTCCAGG  
 AGATCAAAACGCGCTTAAACTTCTGGCAGCGTTCAGTGCCGCGCGTTGAAGCGAAACGTTACTGCCAGGTTTACCGTCCAGACTATGCACGATCGCAAA  
 GTGCGGTGACAAACTGCCGTACGTAACAACGAAAAATCCTGGAGCTGGGTAACCTGGATTTCAACATTTAGTCAATCCACCCAGGAAGAAATGAAAAAC  
 GTGACCTCTTGGTCCGTTGATTCTGGTCTGCCGTTGTTACCTTCGCGCTGAAACGCTCTGGAATTTACTTCTGTTGCCGAGGTACCTACGAACCGC  
 AGTATGCAAAATGCTGTTTCTGTTCACTAAAGTTCGCTGCTGACGCTGTTCTGGAACGATGATGATACCTACCGCATCTGGACCACTGAAACTGTTCT  
 ACTGAGGCTGTGCGTCTGGGATCTGTTTACCAGAAACCTCCGATACATGAACTTTGTTACCAGATCTACTATGACATTTGCCACGAAGTGGCGT  
 GGGAAAGCTGAAAAAGCAACGCTGTAACCTGTTTCTGTTCCGTAAGGTTGGGAAGATTACCTGCTTGGTTATTGAAGAAGCAGAATGGCTGGCTGC  
 TGAATACGTTGCCAGCCTGGATGAGTACATCAAAACCGTATCACCTCCATCGGTCAACGCATCCTGCTGCTGAGCGGTGTGCTGATCATGGACGGCCAGTT  
 GCTGAGCCAGGAAGCACTGAAAAAGTTGATTACCCAGGTCGTCGTGACTGACCGAATGAAATCTCTGATCAGCCGCTGGCGGATGACACCAAACTTAT  
 AAAGCGAAAAAGCAGCTGGTGAACCTGCTTCTCTATTGAATGCTATGAAAGATCACCCGGAATGTACCGAAGAAGAGGCACCTGGATCACATTTACTCCA  
 TCCTCGAACCGCGGTTAAAGAACTGACCCGTTGAGTTCTGAAACCGGATGATGTTCCGTTCCGCTGTAAGAAATGCTGTTGAAAGAACTCGTGTGACCAT  
 GTTTATCTTCAAAGATGGTGACGGTTTCCGTTTCTAACTGGAAGTTAAAGACCACATCAAAAGATGCTGATCGAACCGCTGCCGCTGTAACCTCGAC

## SUPPORTING INFORMATION

PKS<sub>SgcE</sub>

CATATGAGCCGATCGCTACGTGGTGTTGCATGCACCTATCCGGAGCAACCACCCCGCTGAACTGTGGAAAACGACAGTACGAGGCCGTCGTGCCTTT  
CGTCGTCTGCCGACGTGCGTATGCGTCTGGACGATTACTGGAACCCGGACCACCGCTTCCGGACACCTTCTACGCGCGTAAACGCCGCTGTTCTGGAAGG  
CTGGGAATTCGATCGTGACTCATCGTATTGCTGGTCCACCTTCGGTAGCACTGATCTGACCCACTGGCTGGCTGGACACCAGCCGACGCGTGGCTGGC  
TGACGCAGGTTCCCGGCAGTGAAAGGCTGCGGACTGAACGTACCCGCGTGTGATGTTGGTAACACCCCTGACGCGGTGAGTTAGCCGCGCTAACGGTCTGC  
GCCTGCGTGGCCGTACGTTCGCCGCATCCTGCTGACGCACTGCAGGAACGGAATGGGACGACACCCTGGCGCCTTCTGCGCGCGCTGGAAGA  
AGCTACAAGAACCGTTCCCGGCTGTCGAGAAGACACGCTGGCCGGCGCTGAGCAACACCACTGCTGGTTCGATCTGTAACCACTTTGACCTGAAC  
GTGGCGGTACACGGTTGATGGCGCGTGCCTCTAGCTTGGTGGACATCACCACCCGGCTACCTCTGCACTGCGGACCTGGAGCTGCGAGTGGCG  
GGTGGCGTGTATGAGCATGACCCGTTGAAATCATCGGCTTCGCCAAAACCTGGGGCGTGGCGGTAAGAAATGCGTCTGTACGATCGTGGCTCCAAC  
GGTTTCTGGCCGGGGGAGGTTGCGGCATGGTTGTTGATGCGTGAAGAAGACGCGGTTGCGTCCGGCCACCGCATCTATGCATCTATCGCGGTTGGGG  
CATTAGCTGACGGTCAGGGCCGCAATTACTGCCCGGAAGTATCCGGCTACCAGTGGCACTGTCCCGCCTTATGACCGTGCCGTTTCGGATTGAAAC  
CGTGCCGCTGTTGAGGGTCTGTTACCAGCGCAGCGGTTAGGGGACGCAACGGAACCTGCGTGGATCATGAGCGCACGTGCGGGCGCGATCCGACGC  
GCCGTCTGCTGATCACTCTATCAAAGGCATGATCGTACACCAAAGCCGCTGCAGGCACTCGTGGCCTGATTAAAGGCTTAATGGCGCTGGACAGCG  
GTTGTGCTGCCCGGCTATGGTTGTGATCCGCATGACCTGCTACGACAGCACTCGGCAACCTGCGTGTTCGTAAGCCGGAAGCTGGCCGAA  
AACGCCGCTGTCGTTGCGGGCATCACCCGATGGTTTCCGGCGTATCAACACCACTGTTGTCCTGGATCGCTCCGACGCCTCCGGTCTGCGCTGGC  
TAACCGTCTACTACTCTGCTGGCGAACTCTCCAGGATTCTGAGCTGCTCCTGCTTGACGCGTGGTCCCGGCGCGCTGGCGCGTCTGACCCAGG  
TGGCGGATTTCCCGCACAGGTATCTATGCGCAGCTGGGTGACCTGGCAGCCAGCTCCAGCGTGAAGTGTGCTGCCTACCCGCGGCGGCTAGTG  
GCTACTCTCCAGAACGTCGGGAACCTCCGCTCTCGGCCCTGGCGAAACCCGCGGGTGCACCTGATGATGGTCCGGTATTACGTAAGATGGCCG  
CGGTTCTGGTACCGCTGCTGAAGGTGCACGTTGAGGTTCTCTGTTCCGGTCCAGGCTCCGGTACTCCACCGCTGGCGCGCTTGGCACGTCGTT  
TACTGAAGCAGAGAAGTGTATGCACGTGCTGGTTTACTACTGACAGGTGACATGGTTGCTACCCATGTTCTGCTAGCCAGCATCGTTACCGCTCCAGCCC  
TGTTTCCGCGCTGTTGGAAGCGTGGCATCGAAGTGAAGTGTGCTGCATGAGTATCCGCTGGGCTCATTCCCTGGCGAAGTGTCTGCGTGCATGGTGCATG  
AACTACCTCTGGAAGCGGCCCCGACGCGCGGCGGCTATGGCGCACACTCTGCTGTTGGTACCATGGTCTCCCTGACTGCCACTCCAGAGGAAGCT  
GTGCGTGTAGTGAAGGTCTGCGGGTGGTATCTCGGCTACAACGCCCGCGTGCAGCCGTAGTAGCCGGGACTGTGAAGCGGTTGAATCCGTTGGCG  
AGCGCGGGGCGCGTGGATTGCGTTACCCGTTTAGCGGTTAGCCACGCGTTCATAGCCCGCTGGTAGCTCCGCTGCCGAACTCTTTGGTACTGG  
CTCGGAAAGCACCGCGTGGTGGTCTGGGCGTCGCGTAGTTCACCCGTACGGGCGCTGAACGTGGAGCGGTGACACAGATCTGGCTAAACTCTTCGTCA  
ACAGATTACCGACCCGCTTATTACCAGCGGTTGCTGCGCTGCCGCGAAGTAGACCTGTTGTTGAAATTGGGCCAGTCTGTCTGAGGTTCT  
GGCTGCAGAAACCCGCGGTAAACCGCGGTTGCGTTGAACTACTGACGATGAACTCTGCGCGGCTGCTGCAGGTTGTTGGCGCTGCGTTCGTAATCGCG  
CCCAGTACTCACGAGCGTCTTCAATGATCGCTGACTGCCCGTTAGAAAGTAGGCAAAGAAATCCGTTTCTGTCAAGCCCGTGGGAAAGCGCGG  
AATTACCTGCCGCGCGGCTCGGAAACCGCTGGTGCAGGACGATGACGCTCCACCCAGCCGTTGGCGGTTGACTGCTGAAGAATCTGCCCTGGAC  
GTCCTGCGTGCCTGTTGCGGAGCGTGAAGTCCGCTGAGCTGATGATGAAAATTCCTCCCTGCTGGACGATGCAATGCTGTCTATCACTGTT  
GGCCAGATTGTAACGAGCCGAGTGCCTGGGTTGGCACCCTCCAGCACTCCGCAACTTCGCTACCGGACCTGGCTGACTGGCTCCGCTGGC  
GACTCTTTGTCGAAACCGGGCGGATCCGACTGCTGCTCCGGTTTGAACGGTTCCGCGGAGCGTGAACGTGGAGCGGTGACAGATCTGGCTAACTTAC  
CACTGCCGCGCGGCTGGTGGTGAAGGACGCGCACTGGGAATTGTTTACTCTGCTGATCACCCGTTGCTGGAAGAAGTTCGTCGTGCTTGCAGGAC  
CGGCTGTAGGTTTGGTGTCTAGTCTGCGTCCGGCTGGCTGCTCCGGACAGCTGGAAGTGGCTTTAGATGGCGCACGTAGCGCACTCGCGGTTT  
TCAGAAAGCGCGTTCGTTGCTGGTTCAGCATGATCGTGGTGTCTGCTGGTTCGGCAAAACCTCCGACTGGAAAGCCCAGCCGACTGGCGCGTGCAT  
CACC CGGTAGCTGACGGTGTGCTGACCGTGTGCCCGGAAGTGGCGGCGACTACCCACTTTCTGAAGTTACCTGGACCGTATGGTACCCTGCTG  
TTCCGCTGCTGCGTGGCCTGCCGTTCCAGCCGAGCCGACTACTACAGGTTTGGTCCGGATGACGTTTCTGCTGTTACCGGTGGTGAAGGCAATCACT  
GCTGAATGTGCTCGCAGTTCGTAACGTAACCGGTGCGGCTGCGGCTGGCGGTTGCTGGCCGCTGATCAGGATCTGACAGGATCTGCGTGCAGC  
GTCGTATGCGTGAAGTCCGTTGCGTACCGGCGCAGTGTGAACGAAACCCGCGCTGGGTGGCCTGGATGCGAGCGGTGCGCTCGACTGGCACCGAAAG  
GGCAGCGTTACCGTGTTCGACGCGCGCAGGTGTAACGAAACCCGCGCTGGGTGGCCTGGATGCGAGCGGTGCGCTCGACTGGCACCGAAAG  
TTGATGGCTGCGTCACTGCTGAGCCTGACGTTGTAGGTGACAGAACCTGCGTGTGCTGTTACCTTCGGTCTATCATTGGTCCGCTGGCTCCGTTGGCGAA  
CCGCACTACGCTACCGCTAACGAATGGCTGGCAGCCGTAACCGAGGATGTTGACCGTCTGACCCCGACTGTGCTGCAGTGGATGGAATGAGCGTGG  
TCTGGTGTGATGGGTTGAAAAGTGTCCGATGTTGAATCTTGTCCCGTGGAGGTATCGTTCGGTTCCTCCGATCAGGATATCGAAATCTGCTGCGCC  
TGATCTCCGACCCGGACGCTCCAGTAGTACCGTTTACGCGCTCGTACCGAAGTATCGGTAATGTTGCTGCTGAGCAGCCGCGCTCCCGCTGCTGCGC  
TTACCCGGTGAACCGTGTTCGTAACCGGTGTTGAAGTGGTACCGACTGGTACCAGGCAAGTAACGCAAGCAGGCACTGATCTGATCTGACCGACTGATG  
GGCAACCTGCTCCTGCCGGCAGTGATTGGTATGGAAGCTATGGTTGAGTTGGCTCTGCGGTTACTGGCGCTGACGTAACCGGTCATTGAAGACGCTCG  
CTTCTGCTCCGATGTTGTGCCACCGGGCGGTACCAGTGTGCTATCGGATCGCCGCAACCGTACCAGGATACCGTGTGACGTTGCGGTTACGCCCCA  
GGACACCGTTCGGCGCTGAACACTTCGGCGTCTGGTATACGGCGCGCACGCGATCCCGATGGTCCGCGGACCAAGTGGCCCCGAAAGTACC  
ACCGCACCGTGGATCCGGGCGACTGATGTTGGTGGTGTGCTGTTCCAGGGGAAACGCTTCCAGCGTGTGCTGCTGTTTCCATGCTGCTGCGGCAGTCA  
CGTGATGCGGAAGTGCACCTGGACACCCTAGCGGCTGGTTCGCGGTTTTCTGCCGGCACTGCTGCTCTGATCCGGGATGCTGCTGACGCTGCTGA  
TGCACGGAAACAGTTCGCTGCCGACGCAACCCTGCTGCCAAGCGGCATCGAAGCTGTGACCCGATGGCGGCTGGCGAAGATCTGCCGAACTGGT  
TCGCTATTGCGCAACTGAACTCATCGCAGCGAGCACACCTACGTTGACGACATCGCGGTTCTGACCCCGGACGTTCTGTAGTTGAACGTTGGAGCGGCT  
GACGCTGCACGCTGACTGAAAAGCGACGTTCCGGCCATGGTGCTCCGCTGCTGGTTCCTACCTGGAACGTACTCTGGAAGAAGTTCTGGCACCC  
ACGTTGATGTTGACGAGCCGTTCCGGTGTATGCGGTTGAGTGGGTTGCTGACCCGTGTAAGGCGACCCCGCTGCAAGTTACCGTGCCTGGCTGGGAA  
TCCGTTAAAGTGCCTTACCGCCGGATGCTGCTCCGGAACGAGCAGCGTTCGCTGAGCGCGGCGCACGGCCAGGCGTACCCCTGGCGCTAGTGC  
GTACTACCGTGTAGCATGCGACATCGAAGCCGTAACCGCACGTTGGCGCTCAGGAATGGGAAGGTTGCTGCTGGTGAACACGGTAACTGGCAGCTCTGGTA  
GCGAAAAGAACCGGTGAAACCCAGATCACGCGCGACCCGTTGGAGCAGCGGTTGAATGCTGAAAAAAGCTGGTCTGCCGCGGGCGCACCCGCTGA  
CCCTGGAACCGCAAGTACGCTCCGTTGATCGTGTACCAGCGGTTGCTGCGCATGCCACCTTTCGACACCCCTGCGTCACGTTGAAGAACCAGGTA  
GTGCTGGCGTTCTGACCGGCACTGATGATGCTGCGCGGGCTGCTGCTGCTTAAAAGCTT

TE<sub>SgcE</sub>

CATATGACCAGCAACCCCGGATTACTTCGAACCTGCGTCAACCGTGGTTTTGAAGAAACCAACCTGGTTGGTAACGTTTACTACGTTAACTACCTGCGTT  
GGCAGGTCGTTGCCGTGAACTGTTCCTGAAAGAACGTCGCGCGTCTGTTCTGCTGAAAGTTCAGGAAGACCTGAAACTGTTACCCCTGAAAGTGTACTCGC  
AATTTCTGCTGAAATCACCCGTTCCGCAACTGACGATGCTGCTGCTGCTGCTGAAAGTTCAGGATGCTGACTGCTGAGCCAGTGAACCTACCTGACTATCAA  
GGGTGACAGCGTGGTGAACCCCTGGTGGCGTGGTGTGCTGAGCAGTCTGCTGCTGACGCGGCGGCAACCGACTGATTCGAAACCGTTCGAAACCGTGC  
CGCTGCGGGAAGCTCTGGCGCGTACTTACCCTGCGGGTCTTACCAGCGCTGCTGCGGCTTAAAGCTT



## SUPPORTING INFORMATION

## References

- [1] D. M. Peter, B. Vögeli, N. S. Cortina, T. J. Erb, *Molecules* **2016**, *21*, 517.
- [2] T. Schwander, L. S. von Borzyskowski, S. Burgener, N. S. Cortina, T. J. Erb, *Science* **2016**, *354*, 900-904.
- [3] L. Schada von Borzyskowski, F. Severi, K. Kruger, L. Hermann, A. Gilardet, F. Sippel, B. Pommerenke, P. Claus, N. S. Cortina, T. Glatter, S. Zauner, J. Zarzycki, B. M. Fuchs, E. Bremer, U. G. Maier, R. I. Amann, T. J. Erb, *Nature* **2019**, *575*, 500-504.
- [4] M. Kitagawa, T. Ara, M. Arifuzzaman, T. Ioka-Nakamichi, E. Inamoto, H. Toyonaga, H. Mori, *DNA Res.* **2005**, *12*, 291-299.
- [5] a) X. Chen, Z. F. Guo, P. M. Lai, K. H. Sze, Z. Guo, *Angew. Chem. Int. Ed.* **2010**, *122*, 8098-8100; b) Q. Liu, K. Wu, Y. Cheng, L. Lu, E. Xiao, Y. Zhang, Z. Deng, T. Liu, *Met. Engg.* **2015**, *28*, 82-90.
- [6] T. J. Erb, J. Retej, G. Fuchs, B. E. Alber, *J Biol Chem* **2008**, *283*, 32283-32293.
- [7] T. J. Erb, *University of Freiburg* **2009**.
- [8] M. Konneke, D. M. Schubert, P. C. Brown, M. Hugler, S. Standfest, T. Schwander, L. Schada von Borzyskowski, T. J. Erb, D. A. Stahl, I. A. Berg, *Proc Natl Acad Sci U S A* **2014**, *111*, 8239-8244.
- [9] J. Zarzycki, A. Schlichting, N. Strychalsky, M. Muller, B. E. Alber, G. Fuchs, *J Bacteriol* **2008**, *190*, 1366-1374.
- [10] T. J. Erb, L. Frerichs-Revermann, G. Fuchs, B. E. Alber, *J Bacteriol* **2010**, *192*, 1249-1258.
- [11] K. Hoelsch, I. Suhrer, M. Heusel, D. Weuster-Botz, *Appl Microbiol Biotechnol* **2013**, *97*, 2473-2481.
- [12] T. P. Korman, P. H. Opgenorth, J. U. Bowie, *Nat. Comm.* **2017**, *8*, 1-8.
- [13] B. Söhling, G. Gottschalk, *Eur. J. Biochem.* **1993**, *212*, 121-127.
- [14] M. S. Sevinc, W. Ens, P. C. Loewen, *Eur J Biochem* **1995**, *230*, 127-132.
- [15] B. Nocek, S. Kochinyan, M. Proudfoot, G. Brown, E. Evdokimova, J. Osipiuk, A. M. Edwards, A. Savchenko, A. Joachimiak, A. F. Yakunin, *Proc Natl Acad Sci U S A* **2008**, *105*, 17730-17735.
- [16] D. J. Nicholls, J. Miller, M. D. Scawen, A. R. Clarke, J. J. Holbrook, T. Atkinson, C. R. Goward, *Biochem Biophys Res Commun* **1992**, *189*, 1057-1062.
- [17] V. Durbecq, G. Sainz, Y. Oudjama, B. Clantin, C. Bompard - Gilles, C. Tricot, J. Caillet, V. Stalon, L. Droogmans, V. Villeret, *EMBO J.* **2001**, *20*, 1530-1537.
